# Retinoic acid regulates the expression of dorsoventral topographic guidance molecules in the chick retina

Jonaki Sen<sup>1</sup>, Sanjiv Harpavat<sup>1</sup>, Maureen A. Peters<sup>2</sup> and Constance L. Cepko<sup>1,\*</sup>

<sup>1</sup>Department of Genetics and Howard Hughes Medical Institute, Harvard Medical School, 77 Avenue Louis Pasteur, Boston, MA 02115, USA

<sup>2</sup>Department of Biology, Oberlin College, 119 Woodland Street, Oberlin, OH 44074-1097, USA

\*Author for correspondence (email: cepko@genetics.med.harvard.edu)

Accepted 22 September 2005

Development 132, 5147-5159

Published by The Company of Biologists 2005

doi:10.1242/dev.02100

## Summary

Asymmetric expression of several genes in the early eye anlagen is required for the dorsoventral (DV) and anteroposterior (AP) patterning of the retina. Some of these early patterning genes play a role in determining the graded expression of molecules that are needed to form the retinotectal map. The polarized expression of retinoic acid synthesizing and degrading enzymes along the DV axis in the retina leads to several zones of varied retinoic acid (RA) activity. This is suggestive of RA playing a role in DV patterning of the retina. A dominant-negative form of the retinoic acid receptor  $\alpha$  (DNhRAR $\alpha$ ) was expressed in the chick retina to block RA activity. RA signaling was found to play a role in regulating the expression of EphB2, EphB3 and ephrin B2, three molecules whose graded expression in the retina along the DV axis is important for establishing

the correct retinotectal map. Blocking RA signaling by misexpression of a RA degrading enzyme, Cyp26A1 recapitulated some but not all the effects of DNhRAR $\alpha$ . It also was found that Vax, a ventrally expressed transcription factor that regulates the expression of the EphB and ephrin B molecules, functions upstream of, or in parallel to, RA. Expression of DNhRAR $\alpha$  led to increased levels of RA-synthesizing enzymes and loss of RA-degrading enzymes. Activation of such compensatory mechanisms when RA activity is blocked suggests that RA homeostasis is very strictly regulated in the retina.

Key words: Retinoic acid, Dorsoventral, *EphB*, *Ephrin B*, Patterning, Retinotectal map

## Introduction

Establishment of the DV and AP axes constitutes a fundamental step in eye development. Several transcription factors and signaling molecules expressed asymmetrically in the early retina are key to establishing the AP and DV axes of the retina: e.g. Vax (Barbieri et al., 2002; Mui et al., 2002; Schulte et al., 1999) and Ventroptin (Sakuta et al., 2001) in the ventral retina, and Tbx5 and BMP4 (Koshiba-Takeuchi et al., 2000) in the dorsal retina. In addition to these early DV molecules, retinoic acid (RA) activity is asymmetrically distributed along the DV axis in the retina, suggesting that it may play a patterning role. The presence of a dorsal and a ventral zone of RA activity in the retina, separated by a middle zone that is free of RA, is conserved among vertebrate species such as zebrafish, chick and mice (Marsh-Armstrong et al., 1994; McCaffery et al., 1999; Mey et al., 1997). The two zones of RA activity are determined by the expression of two RA-synthesizing enzymes, RALDH1 in the dorsal retina (McCaffery et al., 1992; McCaffery et al., 1991) and RALDH3, formerly known as RALDH6, in the ventral retina (Li et al., 2000; Mic et al., 2000; Suzuki et al., 2000). The mid-zone is free of RA owing to the expression of multiple members of the Cyp26 family of RA-degrading enzymes, including Cyp26A1, Cyp26B1 and Cyp26C1 (Fujii et al., 1997; MacLean et al., 2001; Ray et al., 1997; Reijntjes et al., 2003; Reijntjes et al.,

2004; Swindell et al., 1999; Tahayato et al., 2003). Retinoic acid signal transduction is initiated by the binding of RA to the heterodimer of retinoic acid receptor (RAR) and retinoid X receptor (RXR) (Kastner et al., 1997). This is followed by binding of the receptor-ligand complex to the DNA response elements of RA-responsive genes (Umesono et al., 1991). Retinoic acid has been demonstrated to play a crucial role in the development of many tissues in the embryo, including the eye. Embryos that develop under conditions of vitamin A deficiency are often born with microphthalmia or anophthalmia (Kalter and Warkany, 1959). In zebrafish, RA activity is important for formation of the ventral eye (Hyatt et al., 1996b; Marsh-Armstrong et al., 1994), and later in the patterning/differentiation of photoreceptors (Hyatt and Dowling, 1997; Hyatt et al., 1996a). Knockout mice generated for either of the two RA-synthesizing enzymes in the retina, RALDH1 or RALDH3, did not produce any changes in expression of early DV patterning genes in the retina (Dupe et al., 2003; Fan et al., 2003). In the *RALDH1* knockout mice, compensation by other RA-synthesizing enzymes, such as RALDH3, expressed in the dorsal RPE and dorsal lens at E10.5 (Li et al., 2000; Mic et al., 2000), may account for the lack of an eye-patterning phenotype. Several of the retinoic acid receptors in mice have been mutated either singly or in some combinations. In mice where multiple retinoic acid receptors have been knocked out,

there were severe defects in the eye, e.g. in the lens, cornea, conjunctiva and sclera (reviewed by Mark and Chambon, 2003). In the compound mutants for *Rarb2* and *Rarg2*, there was retinal dysplasia and degeneration (Grondona et al., 1996), which may be due to underlying patterning defects. Analysis of patterning defects per se has not been carried out in these mutants.

In the neural retina, the early and patterned expression of genes such as *Vax*, *Tbx5*, *Bmp4* and *Ventropin* provides spatial cues to the retinal ganglion cells such that their axons project in an orderly fashion to higher brain centers, e.g. the superior colliculus (SC) in mammals and the optic tectum (OT) in birds (Crossland et al., 1974). Ganglion cells next to each other in the retina send projections to neighboring regions in the SC/OT, giving rise to a topographic map. Retinal ganglion cells originating in the dorsal retina project to the lateral tectum and those from the ventral retina send projections to the medial tectum. Similar order is maintained along the AP axis to give rise the retinotectal map (reviewed by McLaughlin et al., 2003a).

Positional values must be assigned to ganglion cells in order for them to form an accurate topographic map. In his chemoaffinity model, Sperry suggested that this process is guided by AP and DV expression gradients of molecules (Sperry, 1963). These were later found to be the Eph family of receptor tyrosine kinases in the retina, and similar rostrocaudal and mediolateral expression gradients of their ligands, the ephrins, have been found in the SC/OT (Simon and O'Leary, 1992a; Simon and O'Leary, 1992b; Simon and O'Leary, 1992c; Wilkinson, 2001). Members of the EphA family of receptor tyrosine kinases in the retina and the ephrin A family members expressed in the tectum (Cheng et al., 1995; Drescher et al., 1995) determine retinotectal projections along the AP axis (Feldheim et al., 2000; Sakurai et al., 2002; Yates et al., 2001). The receptors of EphB family, EphB2 and EphB3, are expressed asymmetrically in a ventral-to-dorsal gradient in the retina (Braisted et al., 1997; Connor et al., 1998; Holash and Pasquale, 1995) and the ligand ephrin B1 is expressed in a medial-to-lateral gradient in the optic tectum (Braisted et al., 1997). Recent experiments using misexpression studies with ephrin B1 in the chick optic tectum (McLaughlin et al., 2003b), and the study of *Ephb2* and *Ephb3* double knockout mice (Hindges et al., 2002), have demonstrated the importance of these molecules for correct DV mapping of the ganglion cells onto the SC/OT.

Very little is known about how the graded expression of the Eph receptors and ephrin molecules are established within the retina. The early DV patterning genes such as *Vax* and *Tbx5* have been demonstrated to play a role in regulating the DV expression gradient of the EphB receptors and the ephrin B ligands (Barbieri et al., 2002; Mui et al., 2002; Schulte et al., 1999). The asymmetric distribution of RA activity along the DV axis and the timeline of expression of the RA-synthesizing and -degrading enzymes suggest that RA might also play a role in the regulation of the expression gradient of the EphB receptors and the ephrin B ligands. The onset of expression of patterning genes such as *Vax* and *Tbx5* is at HH stage 14 (Koshiha-Takeuchi et al., 2000; Schulte et al., 1999). The expression of ephrin B1 and ephrin B2 is detected at HH stage 18-19 in the retina (Braisted et al., 1997; Peters and Cepko, 2002), and the expression of EphB2 and EphB3 can be detected

in the ventral retina by HH stage 24 (Holash and Pasquale, 1995; Peters and Cepko, 2002). The timeline of expression of the RA-synthesizing enzymes RALDH1 and RALDH3, and Cyp26A1, the RA-degrading enzyme, is as follows. RALDH1 is faintly detected in the dorsal eye region at HH stage 14 and subsequently expression becomes stronger by HH stage 16 (Suzuki et al., 2000). RALDH3 is first detected in the ventral eye region at HH stage 12, but only in the surface ectoderm. By HH stage 14, strong expression could be seen in the ventral eye in the presumptive neural retina, pigment epithelium and surface ectoderm (Blentic et al., 2003; Suzuki et al., 2000). Cyp26A1 expression is restricted to dorsal lens alone at HH stage 18 and then is detected in a horizontal stripe across the retina at E6 (Blentic et al., 2003). However, another member of the family, Cyp26B1, is detected in a horizontal stripe across the middle of the retina as early as HH stage 18 (Reijntjes et al., 2003). Thus, RA-synthesizing and -degrading enzymes are expressed at a time and place that is consistent with RA signaling playing a role in regulating the DV topographic guidance molecules.

Redundancy among the various receptor subtypes and the RA-synthesizing enzymes has made it difficult to study the effects of loss of RA activity on patterning in the retina by conventional loss of function studies. In this study, some of these difficulties were surmounted by using a replication-competent avian virus vector, RCAS, to express a dominant-negative form of the human retinoic acid receptor  $\alpha$  (DNhRAR $\alpha$ ) in the chick eye. This method of blocking RA activity in the retina allowed initial eye development to progress to a certain degree, providing an opportunity to study the role of RA in early eye development. It was observed that expression of DNhRAR $\alpha$  led to loss of expression of the EphB2 and EphB3 receptor tyrosine kinases in the ventral retina, and of ephrin B2, one of the dorsally expressed EphB ligands. These data strongly suggest that RA signaling plays an important role in regulating the expression of EphB/ephrin B molecules within the retina. In addition to this, it was found that expression of *Vax* was unchanged by loss of RA activity. However, misexpression of *Vax* in the retina led to loss of expression of the dorsal RA-synthesizing enzyme, RALDH1, and ectopic expression of the ventral RA-synthesizing enzyme, RALDH3, in the dorsal retina. This indicates that *Vax* may regulate expression of EphB2/B3 and ephrin B2 by acting in parallel to, or upstream of, RA activity in the retina.

## Materials and methods

### Chick embryos

Fertilized White Leghorn eggs (SPAFAS, Norwich, CT) were incubated at 38°C for the times indicated. Embryos were staged according to Hamburger and Hamilton (Hamburger and Hamilton, 1951).

### Retroviral constructs and the *lacZ* reporter construct

The insert from pRS-hRAR $\alpha$ , a gift from Ronald M. Evans (Damm et al., 1993) was PCR-amplified using GCAGAAGACCCCATGGC-CAGCAACAGCAGCTCCT as the 5' primer and CCGGAATTCC-AACATTTCTGGATGAGAGGCGG as the 3' primer. The PCR product was digested with *Bbs*I and *Eco*RI, and subcloned into the *Nco*I/*Eco*RI sites of pSlax21 to generate pSlax21-DNhRAR $\alpha$ . The *Cla*I fragment of pSlax21-DNhRAR $\alpha$  was further subcloned into the RCASBP(A) vector (Morgan and Fekete, 1996; Petropoulos and

Hughes, 1991) in order to generate RCAS-DNhRAR $\alpha$ . The insert from pBS-cP450<sup>RAI</sup>(CYP26), a gift from Eric Swindell (Swindell et al., 1999), was similarly cloned into RCASBP(B) to generate the RCAS-Cyp26A1 construct. The DNcTR $\beta$ 2 was constructed by using site-directed mutagenesis (Stratagene) to delete amino acid 245 in the ligand-binding domain of cTR $\beta$ 2, a gift from B. Vennström (Sjoberg et al., 1992) following which the cTR $\beta$ 2 $\Delta$ 245 was cloned into RCASBP(A) to generate the RCAS-DNcTR $\beta$ 2. The RARE-*lacZ* reporter was a gift from M. Wagner (Wagner et al., 1992). The thyroid hormone reporter DR4-*lacZ* was generated by cloning a nuclear *lacZ* downstream of four DR4 repeats and a minimal promoter. Retroviral stocks were generated as described elsewhere (Ausubel, 1998). The titer for all viral stocks was  $1 \times 10^7$  to  $5 \times 10^8$ . The viral stocks for RCAS-DNhRAR $\alpha$  (titer,  $1 \times 10^8$ ) was diluted 1:1 and injected into the right eye at HH stage 17 in order to achieve incomplete infection by E7 to analyze for EphB and ephrin B expression changes by flat-mount in situ hybridization. The RCAS-DNcTR $\beta$ 2 viral stock (titer,  $1 \times 10^8$ ), RCAS-Cyp26A1 (titer,  $1 \times 10^7$ ) and the RCAS-Vax (titer,  $1 \times 10^8$ ) viral stocks were injected undiluted into right and left optic vesicles at HH stage 10-11.

### Cell transfection and $\beta$ -galactosidase assay

Cells from the chick embryonic fibroblast cell line, DF-1 (a gift from D. Foster), were transfected with DNA for: (1) RARE-*lacZ* (2  $\mu$ g DNA) alone; (2) DNA for RARE-*lacZ* (2  $\mu$ g) + DNA for RCAS-DNhRAR $\alpha$  (5  $\mu$ g); (3) DNA for RARE-*lacZ* (2  $\mu$ g) + DNA for RCAS-CYP26A1 (5  $\mu$ g); (4) DNA for DR4-*lacZ* (2  $\mu$ g) alone; or (5) DNA for DR4-*lacZ* (2  $\mu$ g) + DNA for RCAS-cDNTR $\beta$ 2 (5  $\mu$ g) using the Superfect Cell Transfection Reagent from QIAGEN. Transfected DF-1 cells were cultured in culture medium [DMEM + 10% FCS + penicillin/streptomycin (100 U/ml)] with 1  $\mu$ M All-trans-RA (Sigma-Aldrich) for detecting the RA-reporter or in DMEM + 10% FCS + penicillin/streptomycin (100 U/ml) alone for the TH reporter for 24 hours. The cells were fixed in 0.5% glutaraldehyde for 20 minutes on ice followed by four rinses with PBS containing 2 mM MgCl<sub>2</sub>. Cells were incubated with the X-gal reaction buffer (35 mM potassium ferrocyanide, 35 mM potassium ferricyanide, 2 mM MgCl<sub>2</sub>, 0.02% Nonidet P-40, 0.01% Na deoxycholate in PBS) containing 1 mg/ml X-gal [5-bromo-4-choloro-3-indoyl- $\beta$ -D-galactoside (Research Organics)] for 2 hours in the dark at 37°C to allow for blue color to develop.

### [<sup>3</sup>H] thymidine labeling of explanted chick retinae and retinal cell dissociation

RCAS-DNhRAR $\alpha$ -infected E7 chick retinae were dissected free of surrounding tissues and placed on Nuclepore filters of 25 mm diameter (Whatman) with DF10 [45% DME, 45% Ham's F12 Nutrient Mixture (LifeTechnologies, Gaithersburg, MD), 10% FCS, penicillin/streptomycin (100 U/ml) containing 5  $\mu$ Ci [<sup>3</sup>H] thymidine/ml for 4 hours at 37°C]. Each retina was then dissociated into single cells with papain (Blackshaw et al., 2004) which were plated on poly-D-lysine coated slides as previously described (Morrow et al., 1998). The cells on the slides were fixed with 4% paraformaldehyde in PBS for 20 minutes and dehydrated in 100% methanol.

### Immunocytochemistry and autoradiography

Immunocytochemistry was performed on the dissociated cells with 3c2 monoclonal antibody at a dilution of (1:20) to detect virus-infected cells. Slides were processed for autoradiography for detection of the [<sup>3</sup>H] thymidine-labeled cells as described previously (Alexiades and Cepko, 1996).

### RNA in situ hybridization

Flat-mount in situ hybridization was performed as described previously (Bruhn and Cepko, 1996) with some modifications (Chen and Cepko, 2002). Double in situ hybridization was carried out with digoxigenin-labeled RNA probes for specific markers and the fluorescein-labeled probe specific for RCAS to detect virally infected

cells. The probes labeled with digoxigenin were first detected with NBT/BCIP until the desired purple signal developed. This was followed by incubation with AP-conjugated anti-fluorescein antibody. The second in situ hybridization signal was detected with BCIP alone until the desired blue color developed. In some cases the second probe for RCAS was not used; instead, immunostaining was performed with 3c2 mAb recognizing the viral Gag protein, based on the protocol described previously (Chen and Cepko, 2002) to identify virus-infected regions of the retinae.

## Results

### Expression of DNhRAR $\alpha$ in chick embryonic DF-1 cells blocks RA signaling

A dominant-negative allele of the human RAR $\alpha$  was created by Damm et al. (Damm et al., 1989). It is truncated at the level of amino acid 403 and thus lacks a region of the C-terminal domain, which is proposed to be involved in transcriptional activation (Damm et al., 1989; Zenke et al., 1990). This truncated receptor is capable of binding to its heterodimeric partner, RXR, and can bind to the retinoic acid response element (RARE) present in the upstream regions of genes regulated by RA signaling (Damm et al., 1993). A replication competent avian retrovirus, RCAS, was used to transduce this gene (RCAS-DNhRAR $\alpha$ ). Prior to injecting this virus in the chick eye, it was necessary to determine if this human gene was capable of blocking RA signaling in chick cells. Cells from the chick embryonic cell line DF-1 were co-transfected with RCAS-DNhRAR $\alpha$  and RARE-*lacZ*, a reporter for RA activity (Wagner et al., 1992). This reporter consists of the  $\beta$ -galactosidase gene under the control of the RA-binding site (RARE) and the basal promoter from RAR $\beta$ . When an assay for  $\beta$ -galactosidase was performed with DF-1 cells transfected with the RARE-*lacZ* reporter alone, they turned blue (Fig. 1A). By contrast, those co-transfected with the RARE-*lacZ* reporter and DNA for RCAS-DNhRAR $\alpha$  did not turn blue (Fig. 1B).

### Expression of DNhRAR $\alpha$ in the chick retina leads to reduction in eye size

Microphthalmia has been observed in mammalian embryos born from females fed with a diet deficient in vitamin A (Hale, 1937; Wilson, 1953). Thus, a reduction in eye size might occur when RA activity is blocked by expression of DNhRAR $\alpha$  in the chick retina. Such a phenotype would be an additional means of confirming that the DNhRAR $\alpha$  functions in the chick retina. When the eyes of chick embryos injected with RCAS-DNhRAR $\alpha$  at HH stage 17 were compared at E7, the injected right eye was observed to be significantly smaller than the



**Fig. 1.** RA activity assayed in DF-1 cells after co-transfection with RARE-*lacZ* and RCAS-DNhRAR $\alpha$ . X-gal staining of DF-1 cells transfected with RARE-*lacZ* (RA-reporter) alone (A) or with RARE-*lacZ* and RCAS-DNhRAR $\alpha$  (B).

**Fig. 2.** Comparison in eye size and proliferation between RCAS-DNhRAR $\alpha$  infected and uninfected eyes. (A) Two eyes from one E7 embryo, injected in the right eye with RCAS-DNhRAR $\alpha$  at HH stage 17. Uninjected control eye on the left and the injected eye on the right. White arrowhead shows ventral fissure region of injected eye. (B,D) Dissociated cells from retina injected with RCAS-DNhRAR $\alpha$  or (D) with RCAS-GFP, labeled with [ $^3$ H] thymidine (dark grains) and 3c2 anti viral-gag antibody (red) and DAPI (blue). (C) Dissociated cell counts from 4 hour [ $^3$ H] thymidine-labeled E7 retinæ that were injected with RCAS-GFP control virus or RCAS-DNhRAR $\alpha$ . The percentage of [ $^3$ H] thymidine-labeled cells were counted among the infected, 3c2+ population (green bar and dark blue bars) as well as the uninfected, 3c2- population (red bars and light blue bars). The data for RCAS-DNhRAR $\alpha$  are from nine infected retinæ and the data for RCAS-GFP are from six infected retinæ.



uninjected left eye. This phenotype was observed in >20 injected embryos of which one is shown in Fig. 2A. In some animals, the injected eye size was as small as one half of the control eye size. In addition, the ventral fissure (white arrowhead) appeared to be wider and more distinct in the injected eye than in the contralateral uninjected eye (Fig. 2A). This smaller eye phenotype was apparent from E5 and the severity of the phenotype correlated with the extent of viral infection in the retina as assayed by staining with the 3c2 antibody against viral Gag protein. The small eye phenotype as well as all other phenotypes observed when injecting the RCAS-DNhRAR $\alpha$  virus were the same regardless of whether the stage of injection was HH stage 10 or HH stage 17. The only difference was in the total area of the retina that was infected, with a greater extent of infection in those infected at HH stage 10. Thus, mostly retinæ injected at HH stage 17 are shown in the figures in order to allow for a comparison of infected and uninfected regions within the same retina.

A reduction in eye size could be caused either by increased cell death or decreased rate of cell proliferation. A TUNEL assay was performed on sections of embryonic day 7 (E7)

chick retinæ from eyes injected with RCAS-DNhRAR $\alpha$ . TUNEL-positive cells were not found in the infected or uninfected regions of the retina (data not shown). This suggests that the size reduction in the retina is not primarily due to increased cell death. In order to discover if changes in cell proliferation might account for the smaller eyes, explant cultures from nine different E7 retinæ, R1 to R9, injected in vivo at HH stage 10 with RCAS-DNhRAR $\alpha$ , were labeled with [ $^3$ H] thymidine for 4 hours. Retinal explants were then dissociated into single cells and immunohistochemistry was performed with 3c2 antibody against the viral Gag protein to identify infected cells (Fig. 2B,D). The number of [ $^3$ H] thymidine-labeled cells (cells containing at least 10 grains per cell) among the infected (3c2 positive) population as well as among the uninfected (3c2 negative) population in each retina was counted (Table 1). An average  $9.4 \pm 2.25\%$  of infected cells were labeled when compared with about  $15.2 \pm 2.37\%$  of the uninfected cells (Table 1; Fig. 2C, red and green bars). As a control, the same was carried out with six retinæ, G1 to G6, infected with RCAS-GFP. In this case,  $18.1 \pm 0.75\%$  of the uninfected cell were [ $^3$ H] thymidine labeled and  $18.8 \pm 1.15\%$

**Table 1. Percentage of infected cells (3c2+) and uninfected cells (3c2-) that were labelled with [ $^3$ H] thymidine in retinæ infected with RCAS-DNhRAR $\alpha$  and RCAS-GFP**

| RCAS-DNhRAR $\alpha$ infected | % [ $^3$ H]/3c2-        | % [ $^3$ H]/3c2+        | RCAS-GFP infected | % [ $^3$ H]/3c2-        | % [ $^3$ H]/3c2+       |
|-------------------------------|-------------------------|-------------------------|-------------------|-------------------------|------------------------|
| R1                            | 17.2                    | 12.7                    | G1                | 17.0                    | 18.5                   |
| R2                            | 19.6                    | 12.3                    | G2                | 18.9                    | 18.3                   |
| R3                            | 12.4                    | 8.2                     | G3                | 18.0                    | 19.6                   |
| R4                            | 17.6                    | 12.1                    | G4                | 18.4                    | 21.6                   |
| R5                            | 13.1                    | 7.9                     | G5                | 18.8                    | 17.6                   |
| R6                            | 14.2                    | 7.4                     | G6                | 17.5                    | 17.7                   |
| R7                            | 14.2                    | 7.4                     |                   |                         |                        |
| R8                            | 14.8                    | 8.6                     |                   |                         |                        |
| R9                            | 14.0                    | 8.2                     |                   |                         |                        |
|                               | Mean=15.23<br>s.d.=2.37 | Mean=9.42<br>s.d.=2.245 |                   | Mean=18.1<br>s.d.=0.748 | Mean=18.8<br>s.d.=1.15 |

Student's *t*-test (type 2, tail 1):  $P=1.98378 \times 10^{-7}$ .

of the infected cells were labeled (Table 1 and Fig. 2C, light-blue and dark-blue bars). Thus, RCAS-DNhRAR $\alpha$ -infected cells were significantly reduced in proliferation ( $P < 0.0001$ ). When several rounds of cell division are taken into consideration, this difference is likely to be sufficient for the observed reduction in eye size.

### Blocking RA signaling in the retina alters expression of molecules that direct retinotectal projections along the DV axis

In several vertebrate species, there is a zone of RA signaling in the dorsal and ventral retina. These zones are separated in the middle by a zone which is free of RA. Infection with RCAS-DNhRAR $\alpha$  in the chick retina was carried out to determine if the expression of genes that were asymmetrically expressed along the DV axis might be RA dependent. Some of

the candidate genes examined for expression changes were the EphB family of tyrosine kinase receptors and their ligands, the ephrin B molecules. The EphB family members, EphB2 and EphB3, are expressed in a ventral high to dorsal low gradient (Fig. 3A,E) in the retina in both chick and mouse (Braisted et al., 1997; Hindges et al., 2002; Holash and Pasquale, 1995). Two ephrin B family members, ephrin B1 and ephrin B2, which serve as ligands for the EphB receptors, also are expressed, but in reciprocal dorsal high to ventral low gradients in the retina (Fig. 3I,M) (Braisted et al., 1997). Chick embryos at HH stage 17 were injected in the right eye alone with RCAS-DNhRAR $\alpha$ , and allowed to develop to E7. The retinæ from the right eyes of injected animals were harvested, flat-mounted and in situ hybridization was performed to detect expression changes in ephrin B1, ephrin B2, EphB2 and EphB3. Expression of DNhRAR $\alpha$  led to an absence of expression of



**Fig. 3.** Expression of EphB2, EphB3, ephrin B2 and ephrin B1 in uninfected and RCAS-DNhRAR $\alpha$  infected retinæ. In situ hybridization carried out on flat-mounted E7 retina either uninjected or injected with RCAS-DNhRAR $\alpha$ . Retinæ shown with dorsal towards the top, ventral towards the bottom, anterior (nasal) towards the left and posterior (temporal) towards the right. In situ hybridization of uninjected E7 retina, with EphB2 (A), EphB3 (E), ephrin B2 (I) and ephrin B1 (M). Double in situ hybridization of RCAS-DNhRAR $\alpha$  injected E7 retina with EphB2 and RCAS probes (B-D). Magnified view of the boxed area from B showing EphB2 expression (purple signal, C) and RCAS infection (blue signal, D). RCAS-DNhRAR $\alpha$  injected E7 retina with double in situ hybridization for EphB3 and RCAS probes (F-H). Magnified view of the boxed area in F showing EphB3 expression (purple signal, G) and RCAS-infected area (blue signal, H). RCAS-DNhRAR $\alpha$ -injected E7 retina with double in situ hybridization for ephrin B2 and RCAS probes (J-L). Magnified view of boxed area in J showing ephrin B2 expression (purple signal, K) and RCAS infected area (blue signal) (L). RCAS-DNhRAR $\alpha$  injected E7 retina with double in situ hybridization for ephrin B1 (purple signal, N) and RCAS (blue signal, O). The white arrows indicate infected areas with subtle downregulation of ephrin B1 expression.



**Fig. 4.** Expression of EphB2, EphB3, ephrin-B2 and ephrin-B1 in RCAS-DNcTR $\beta$ 2-infected retinæ. Flat-mounted E7 retina oriented with dorsal towards the top, ventral towards the bottom, anterior (nasal) towards the left and posterior (temporal) towards the right, injected with RCAS-DNcTR $\beta$ 2 on which double in situ hybridization

was carried out with the following probes: EphB2 (purple signal, A) and RCAS (blue signal, B), EphB3 (purple signal, C) and RCAS (blue signal, D), ephrin B2 (purple signal, E) and RCAS (blue signal, F) and ephrin B1 (purple signal, G) and RCAS (blue signal, H). X-gal staining of DF-1 cells transfected with DR4-*lacZ* (TH-reporter) alone (I) and with DR4-*lacZ*+ RCAS-DNcTR $\beta$ 2 (J).

ephrin B2 (Fig. 3J,K,L) in the dorsal retina. Ephrin B1, however, remained largely unchanged (Fig. 3N,O), although there appears to be a slight reduction in the expression of ephrin B1 in some infected patches (Fig. 3N,O, arrows). However, this reduction in expression levels is very subtle, particularly when compared with the dramatic reduction in expression of ephrin B2. This indicates that RA signaling plays a significant role in regulating the expression of ephrin B2, but not that of ephrin B1. In the ventral retina, absence of expression of both EphB2 (Fig. 3B-D) and EphB3 (Fig. 3F-H) was observed within the infected areas (Fig. 3D,H, blue signal).

A dominant-negative form of thyroid hormone receptor  $\beta$ 2 (DNcTR $\beta$ 2) was chosen as a control to determine if the phenotype caused by DNhRAR $\alpha$  might be produced by indirect effects on thyroid hormone (TH) signaling. DNcTR $\beta$ 2 was constructed by deleting a single amino acid residue within the ligand-binding domain. A similar mutation in the human thyroid hormone receptor has been demonstrated to give rise to a dominant-negative form (Baniahmad et al., 1992; Usala et al., 1991). The ability of this construct to function as a dominant negative was assessed by co-transfecting a TH-reporter construct, DR4-*lacZ*, together with RCAS- DNcTR $\beta$ 2 into DF-1 cells. Cells transfected with DR4-*lacZ* alone (Fig. 4I) had many blue nuclei, as this reporter expresses nuclear-*lacZ*, whereas almost no cells with blue nuclei were observed among the cells transfected with DR4-*lacZ*+RCAS- DNcTR $\beta$ 2 (Fig. 4J).

RA signaling is mediated through heterodimers of RA receptor (RAR) and retinoid X receptor (RXR), whereas TH signaling is mediated through heterodimers of the thyroid hormone receptor (TR) and RXR (Kliwer et al., 1992). Thus, there is a possibility that the DNhRAR $\alpha$  could block TH signaling by sequestering all available RXR molecules in a cell. For example, when DF-1 cells were co-transfected with either RARE-*lacZ* (RA-reporter) + RCAS- DNcTR $\beta$ 2 or with

DR4-*lacZ* (TH-reporter) + RCAS-DNhRAR $\alpha$ , it was observed that very few to none of the cells turned blue (data not shown), indicating that both RA signaling and TH signaling can be blocked by either construct.

In order to ascertain whether the effects on expression of EphB2, EphB3 and ephrin B2 could be mediated by blocking thyroid hormone signaling, RCAS-DNcTR $\beta$ 2 was introduced into the chick retina. Infection with RCAS-DNcTR $\beta$ 2 did not alter the expression patterns of EphB2 (Fig. 4A,B), EphB3 (Fig. 4C,D), ephrin B1 (Fig. 4E,F) or ephrin B2 (Fig. 4G,H). Infection with RCAS-DNcTR $\beta$ 2 also did not lead to alteration of expression of the two RA-synthesizing enzymes RALDH1 and RALDH3 (data not shown), indicating that there is no interaction between the RA signaling and TH pathway at this level.

#### Expression of a RA-degrading enzyme, CYP26A1, can reproduce some, but not all, of the effects of DNhRAR $\alpha$

In order to investigate the role of RA signaling in regulating the expression of EphB2, EphB3 and ephrin B2 by an independent approach, RA signaling was reduced by expression of a RA-degrading enzyme, Cyp26A1. Retinæ were harvested at E7 from chick embryos injected with RCAS-Cyp26A1 at HH stage 10. Infection with RCAS-Cyp26A1 in the ventral retina produced no change in expression of EphB2 (Fig. 5C,G, white arrowhead) or EphB3 (Fig. 5D,H, white arrowhead). However, in the dorsal retina loss of expression of ephrin B2 (Fig. 5A, black arrow) was observed within RCAS-Cyp26A1-infected regions (Fig. 5E, black arrow), but no change in expression of ephrin B1 was observed (Fig. 5B,F, white arrowhead). The changes observed in the dorsal retina were very similar to the effects of expression of DNhRAR $\alpha$ . The normal expression pattern of Cyp26A1 in the chick retina is a midline stripe along the DV border (Fig. 5K, between the white arrows) with very low level



**Fig. 5.** Expression of EphB2, EphB3, ephrin B2 and ephrin B1 in RCAS-Cyp26A1-infected retinas. Flat-mounted E7 retina oriented with dorsal towards the top and ventral towards the bottom, anterior (nasal) towards the left and posterior (temporal) towards the right, injected with RCAS-Cyp26A1 on which double in situ hybridization was carried out with the following probes: ephrin B2 (purple signal, A) and RCAS (blue signal, E), ephrin-B1

(purple signal, B) and RCAS (blue signal, F), EphB2 (purple signal, C) and RCAS (blue signal, G) and EphB3 (purple signal, D) and RCAS (blue signal, H). Black arrows indicate areas of loss of expression of ephrin B2 (A) and RCAS infection (E). White arrowheads point to areas of RCAS infection overlapping with ephrin B1 (F), EphB2 (G) and EphB3 (H). In situ hybridization of uninjected E7 retinas with ephrin B2 (I), ephrin B1 (J) and Cyp26A1 (K). White arrows indicate ventral expression borders of ephrin B2 (I) and ephrin B1 (J) and expression domain of Cyp26A1 (K). X-gal staining of DF-1 cells transfected with RARE-*lacZ* (RA-reporter) alone (L), with RARE-*lacZ*+ RCAS-DNhRAR $\alpha$  (M) and with RARE-*lacZ*+ RCAS-Cyp26A1 (N).

expression outside this domain in the dorsal and ventral retina. The differential effects of RCAS-Cyp26A1 on ephrin B1 and ephrin B2 may be due to the fact that the ventral border of expression of ephrin B1 extends further ventrally than that of ephrin B2 in the wild-type retina (Fig. 5I,J, white arrows) such that it overlaps with the expression domain of CYP26A1. In the ventral retina, EphB2 and EphB3 expression was not affected by RCAS-Cyp26A1. When DF-1 cells were co-transfected with either RARE-*lacZ* alone, RARE-*lacZ* + RCAS-DNhRAR $\alpha$  or RARE-*lacZ* + RCAS-Cyp26A1 (Fig. 5L,M,N), DNhRAR $\alpha$  was able to completely block the reporter, although there were a few blue cells (Fig. 5N) with Cyp26A1. As this experiment was carried out in vitro, in the presence of RA levels in excess of that in the retina, it suggests that Cyp26A1 may not be as efficient at blocking RA signaling as DNhRAR $\alpha$ .

#### The expression of RALDH1, RALDH3 and Cyp26A1 is altered by expression of DNhRAR $\alpha$

There are four known retinaldehyde dehydrogenase enzymes that synthesize RA (Grun et al., 2000; Lee et al., 1991; Li et al., 2000; Lin et al., 2003; Suzuki et al., 2000; Zhao et al., 1996) and three members of the cytochrome P450-linked oxidase family (CYP26) that degrade RA (Abu-Abed et al., 2002; Fujii et al., 1997; MacLean et al., 2001; Ray et al., 1997; Tahayato et al., 2003; Taimi et al., 2004; White et al., 2000). Of the synthesizing enzymes, RALDH1 and RALDH3 are expressed in the retina in spatially restricted domains in the

dorsal and ventral retina, respectively. The reduction of RA signaling by RCAS-DNhRAR $\alpha$  may lead to activation of homeostatic mechanisms to restore RA levels. Thus, the expression of the two RA-synthesizing enzymes and Cyp26A1 were assayed following infection with RCAS-DNhRAR $\alpha$ . Upregulation of RALDH1 within virus-infected areas in the dorsal retina (Fig. 6A,D,G,J) and upregulation of RALDH3 within virus-infected areas in the ventral retina (Fig. 6B,E,H,K) were observed. The upregulation of RALDH1 was restricted to its normal domain of expression in the dorsal retina (Fig. 6A,D, arrowhead), even if there was viral infection in the ventral retina (Fig. 6D, arrow). The upregulation of RALDH3 was similarly restricted to its normal ventral domain (Fig. 6B,E, arrowhead; Fig. 6E, arrow). Cyp26A1 is expressed at high levels in an equatorial stripe running across the DV border in the retina with very low levels of expression outside this central domain. Cyp26A1 expression was downregulated in virus-infected areas (Fig. 6C,F,I,L) both within its normal central domain of expression as well as in other regions of the retina where there was virus infection.

#### Vax regulates the expression of RA-synthesizing enzymes, but RA activity is not required for expression of Vax

In the chick retina, the homeodomain-containing transcription factor Vax is expressed at HH stage 14 in the ventral retina. Misexpression of Vax in the chick retina has been demonstrated to cause loss of expression of both ephrin B1 and

ephrin B2 in the dorsal retina, and lead to ectopic expression of EphB2 and EphB3 in the dorsal retina (Schulte et al., 1999). In order to understand the epistatic relationship between Vax and RA with respect to regulation of EphB and ephrin B, the expression of Vax and another early patterning gene, Tbx5, was examined following expression of DNhRAR $\alpha$ . The ventral retinal expression of Vax (Fig. 7A,B), as well as the dorsal retinal expression of Tbx5 (Fig. 7C,D) appeared to be unchanged within regions of virus infection.

In order to examine the possibility that Vax regulates the expression of the ephrin B and EphB molecules in the chick retina through RA, the effects of misexpression of Vax on the expression of RALDH1 and RALDH3 were determined. E6 retinæ were harvested from chick embryos injected with RCAS-Vax at HH stage 10, and in situ hybridization was performed for RALDH1 and RALDH3. Vax misexpression led to downregulation of the dorsal RA-synthesizing enzyme RALDH1, (Fig. 7I,J) and ectopic expression of the RALDH3

enzyme in the dorsal retina within the virus-infected areas (Fig. 7E-H).

## Discussion

### Retinoic acid signaling is essential for expression of EphB2, EphB3 and ephrin B2 in the chick retina

The fact that RA plays a fundamental role in eye development has been appreciated for many decades. However, previous studies have only identified an early function of RA activity in development of the DV axis in the eye. This has been demonstrated in zebrafish, where altering RA levels has a profound effect on development of the ventral retina (Hyatt et al., 1996b; Marsh-Armstrong et al., 1994). The extent to which RA influences the formation of the ventral retina is variable in other vertebrate species. In mice, some of the strains with RA receptor mutations (Mark and Chambon, 2003) and loss of RALDH3 (Dupe et al., 2003) have a shortened ventral retina.

In chick, perturbing RA activity had no effect on the formation of the ventral retina (Mey et al., 2001). However, the division of the retinal DV axis into several zones of RA activity suggests that, in addition to being required very early for development of the ventral retina in some species, RA activity plays a role in other aspects of development along the DV axis. In this study, the RCAS viral vector delivered DNhRAR $\alpha$  primarily to the retina and presumably blocked RA signaling by any RAR, providing a means to overcome lethality and/or redundancy problems encountered by previous gene targeting studies in mice. This approach permitted successful identification of later functions of RA in the retina.

Signaling through RA receptors was shown to be required for the expression of the EphB2 and EphB3 receptor tyrosine kinases in the ventral



**Fig. 6.** Expression of RALDH1, RALDH3 and Cyp26A1 on retinæ infected with RCAS-DNhRAR $\alpha$ . Flat-mounted E7 retina oriented with dorsal towards the top, ventral towards the bottom, anterior (nasal) towards the left and posterior (temporal) towards the right, injected with RCAS-DNhRAR $\alpha$ , on which double in situ hybridization was carried out with the following probes: RALDH1 (purple signal, A,D,G) and RCAS (blue signal, D), RALDH3 (purple signal, B,E,H) and RCAS (blue signal, E) and Cyp26A1 (purple signal, C,F,I,L) and RCAS (blue signal, F,L). White arrowhead (A) indicates area of upregulation of RALDH1 within its normal domain of expression. Black arrowhead (B) indicates upregulation of RALDH3 within its normal domain of expression. Black arrowheads indicate RCAS-infected regions within the normal domain of expression of RALDH1 (D) and of RALDH3 (E) and black arrows indicate RCAS-infected regions outside the normal domain of expression of RALDH1 (D) and of RALDH3 (E). (G,J) Magnified views of boxed region in A showing upregulated RALDH1 expression (G) and RCAS infection (J); (H,K) magnified views of boxed region in B showing upregulated RALDH3 expression (H) and RCAS infection (K); (I,L) magnified views of C and F showing loss of Cyp26A1 expression (I) and RCAS infection (L). Uninjected E7 retinæ showing RALDH1 (M) and RALDH3 (N) expression domains.

RCAS-infected regions outside the normal domain of expression of RALDH1 (D) and of RALDH3 (E). (G,J) Magnified views of boxed region in A showing upregulated RALDH1 expression (G) and RCAS infection (J); (H,K) magnified views of boxed region in B showing upregulated RALDH3 expression (H) and RCAS infection (K); (I,L) magnified views of C and F showing loss of Cyp26A1 expression (I) and RCAS infection (L). Uninjected E7 retinæ showing RALDH1 (M) and RALDH3 (N) expression domains.



**Fig. 7.** In situ hybridization with Vax and Tbx5 on retinæ infected with RCAS-DNhRAR $\alpha$  and in situ hybridization with RALDH1 and RALDH3 on RCAS-Vax infected retinæ. Flat-mounted E7 retina oriented with dorsal towards the top and ventral towards the bottom, anterior (nasal) towards the left and posterior (temporal) towards the right, injected with RCAS-DNhRAR $\alpha$ , on which in situ hybridization was carried out with the following probes: Vax (purple signal, A) and

Tbx5 (purple signal, C). The RCAS infection (brown) was detected by immunohistochemistry using 3c2 anti viral-Gag antibody (B,D). (E-H) E7 retina oriented as above, injected with RCAS-Vax on which double in situ hybridization was carried out with RALDH3 (purple signal, E,G) and RCAS (blue signal) (F,H). Magnified views of E and F are shown in G and H, respectively. (I,J) E7 retina also injected with RCAS-Vax on which in situ hybridization was carried out with RALDH1 (lack of purple signal, I) and RCAS (blue signal, J).

retina, and also for ephrin-B2 in the dorsal retina. The fact that EphB-ephrin B signaling specifies retinotopic mapping along the DV axis has been demonstrated by several studies. Recent studies with mice carrying mutations in both *Ephb2* and *Ephb3* receptors have shown that EphB forward signaling controls topographic mapping of the retinal DV axis along the lateromedial axis of the superior colliculus (Hindges et al., 2002). Other studies in *Xenopus* have also shown that EphB-ephrin B interactions are responsible for retinotopic mapping. However, in this case, ephrin B reverse signaling is dominant (Mann et al., 2002). It is postulated that such signaling may also contribute to retinotopic mapping in higher vertebrates, especially for the dorsal RGC axons. A retina completely infected with DNhRAR $\alpha$  has almost no, or extremely low, expression of EphB2, EphB3 and ephrin B2 (data not shown). This is not unlike the double mutant mice for EphB2 and EphB3, and therefore would be expected to have a similar phenotype with respect to mapping DV retinal projections along the lateromedial axis of the tectum. Thus, RA signaling is important for establishment of the DV retinotopic map through regulating the expression of the EphB2, EphB3 and ephrin B2.

The independent approach of using RCAS-Cyp26A1 to lower the levels of RA signaling in the retina produced effects on EphB2 and EphB3 that were different from those obtained with RCAS-DNhRAR $\alpha$ . With RCAS-Cyp26A1, there was no change in the expression of EphB2 and EphB3. This difference might be explained by the existence of lower levels of RA in the dorsal retina when compared with the ventral retina, as determined by HPLC (Mey et al., 1997). This is due to differences in substrate range and enzyme kinetics between the dorsal RA-synthesizing enzyme RALDH1 and the ventral RA-synthesizing enzyme RALDH3 (McCaffery et al., 1992). Lowering of RA levels by Cyp26A1 in the ventral retina might be compensated for by the higher RA-synthesizing activity of

RALDH3, perhaps leading to only a minor reduction in RA signaling, and thus no effect on the expression of EphB2 and EphB3. The fact that Cyp26A1 maybe less efficient at blocking RA signaling compared with DNhRAR $\alpha$  is demonstrated by the inability of RCAS-Cyp26A1 to completely turn off the RA-reporter in DF-1 cells in the presence of excess RA.

#### **Perturbations of RA activity in the retina lead to activation of homeostatic mechanisms to maintain RA levels**

Retinoic acid is required for the morphogenesis, organogenesis and differentiation of many tissues during development (Kalter and Warkany, 1959). In order to achieve this, it is likely that appropriate levels of RA need to be strictly maintained, with adjustments in RA levels made according to local requirements. Given the fact that both deficiency of, and excess of, RA have profound effects on development, it might be predicted that compensatory mechanisms are active in the developing embryo to regulate RA levels. We found that when there is a significant block in RA signaling by expression of the DNhRAR $\alpha$  receptor, upregulation of the RA-synthesizing enzymes RALDH1 and RALDH3 occurred. The domains of upregulation of each enzyme were within their normal field of expression, suggesting that there are other spatially restricted factors that regulate the expression of RALDH1 and RALDH3. In addition, expression of DNhRAR $\alpha$  led to downregulation of Cyp26A1, the RA-degrading enzyme. This is not surprising because the studies that first identified Cyp26A1 showed that its expression was increased by RA (Ray et al., 1997; White et al., 2000). The expression of Cyp26B1, another member of this family, is also regulated by RA (Reijntjes et al., 2003).

Expression of DNhRAR $\alpha$  leads to conditions that are somewhat different when compared with deficiency of vitamin A. In the case of RA deficiency, the ligand is missing. By contrast, DNhRAR $\alpha$  blocks transcription through formation of

inactive RAR-RXR heterodimers that cannot activate target genes. Thus, even if compensatory mechanisms are recruited to increase the levels of RA, the block in transcription of target genes will not be overcome. Yet, compensatory mechanisms appear to be activated to try to maintain optimal RA signaling. This underscores the importance of RA homeostasis in developing and mature tissues.

### Relationship of RA activity to other DV patterning genes in the retina

The patterning of the AP and DV axes of the retina and retinotectal topographic mapping are intrinsically linked to each other. Some of the transcription factors expressed asymmetrically in the retina to define its axial polarity, such as *Vax* and *Tbx5*, have been implicated in the regulation of expression of topographic guidance molecules, e.g. EphB and ephrin B family members. In the *Vax2* knockout mouse, the expression of ephrin B1 and ephrin B2 are expanded into the ventral retina, while there is loss of expression of EphB2 and EphB3 in the ventral retina (Barbieri et al., 2002; Mui et al., 2002).

Observations made after blocking RA signaling in the retina indicate that RA also plays an important role in regulating the expression of some of these guidance molecules. Thus, *Vax* may function either upstream of or in parallel to RA signaling to regulate the expression of ephrin B2, EphB2 and EphB3. The epistatic relationship between RA activity and some of the early DV axis determining genes in the retina was investigated in this study. Blocking RA activity in the retina did not alter the dorsal expression of *Tbx5* or the ventral expression of *Vax*. This might have been predicted given that *Vax* and *Tbx5* are expressed prior to *RALDH1*, *RALDH3* and *Cyp26* in the retina. However, misexpression of *Vax* in the retina alters the expression of the RA-synthesizing enzymes *RALDH1* and *RALDH3*. *Vax* misexpression downregulates the expression of *RALDH1* in the dorsal retina and leads to ectopic expression of the ventral enzyme *RALDH3* in the dorsal retina. These observations could be consistent with the two models described below.

#### Model 1

The transcription factors *Vax* and *Tbx5* function through RA to regulate the expression of EphB2, EphB3 and ephrin B2 in the retina. According to this model, *Vax* regulates the expression of EphB3 and EphB2 in the ventral retina by turning on the expression of *RALDH3*, which produces RA that is involved directly or indirectly in the transcriptional activation of EphB2 and EphB3 (Fig. 8A). In the dorsal retina, *Tbx5* might lead directly or indirectly to expression of *RALDH1*, the source for RA, that positively regulates the expression of ephrin B2. Misexpression of *Vax* in the dorsal retina leads to loss of expression of *RALDH1*. This could be due to a direct inhibition of *RALDH1* by *Vax* or it could act through

downregulation of *Tbx5*, which has previously been reported (Schulte et al., 1999). Thus, *Vax* misexpression leads to loss of ephrin B2 expression because there is no *RALDH1* in the dorsal retina.

#### Model 2

*Vax* regulates the expression of EphB2 and EphB3 in the ventral retina and *Tbx5* regulates ephrin B2 in the dorsal retina, by acting in parallel to RA. According to this model, both *Vax* and RA activity are required in the ventral retina for expression of EphB2 and EphB3. Thus, in the absence of either *Vax* or RA activity, EphB2 and EphB3 are not expressed. This would be possible because both *Vax* and RA independently exerted positive effects on the enhancers for these genes (Fig. 8B). In the dorsal retina, RA activity and *Tbx5* would act independently to positively regulate the expression of ephrin B2. Missing either factor would lead to loss of ephrin B2 expression. When *Vax* is misexpressed in the dorsal retina, it downregulates ephrin B2 expression through downregulating *Tbx5* and/or *RALDH1*.

A. Model 1: *Vax* and *Tbx5* function through RA to regulate expression of EphB2, EphB3 and ephrin-B2



B. Model 2: *Vax/Tbx5* and RA act independently to regulate expression of EphB2, EphB3 and ephrin-B2



**Fig. 8.** Models describing the two possible modes of regulation of expression of EphB2, EphB3 and ephrin B2 by RA, *Vax* and *Tbx5*. Model 1: *Vax* and *Tbx5* function in the dorsal and ventral retina to regulate the expression of ephrin B2, EphB2 and EphB3 exclusively through the RA synthesizing enzymes, *RALDH1* and *RALDH3*. Model 2: *Vax* and *Tbx5* function independently of RA to regulate expression of EphB2, EphB3 and ephrin B2. According to this model, both *Tbx5*-dependent and RA-dependent positive inputs are required to express ephrin B2 in the dorsal retina. The enhancer regions of EphB2 and EphB3 would require positive inputs from both *Vax* and RA for their expression in the ventral retina.

If the first model is true, then the effects of Vax on the expression of EphB2, EphB3 and ephrin B2 have to be mediated only through regulation of RA activity. In that case, there would have to be some intrinsic difference between the RA activity in the dorsal retina and the ventral retina to account for the expression of the ephrin B molecules in the dorsal retina versus the EphB molecules in the ventral retina. The only known difference in RA activity between the dorsal and the ventral retina is in the source of RA synthesis, which is RALDH1 in one case and RALDH3 in the other. There are two differences between RALDH1 and RALDH3, one is in their ability to synthesize the different forms of RA and the second one is in their efficiency at synthesizing RA. RALDH1 has the ability to synthesize both 9-cis RA and all-trans RA (Labrecque et al., 1995), whereas RALDH3 can only synthesize all-trans RA (Yoshida et al., 1998). The retinoid X receptor (RXR), which is the heterodimeric partner for the retinoic acid receptor (RAR) can also signal by forming RXR-RXR homodimers that exclusively uses 9-cis RA as a substrate (Mangelsdorf et al., 1995). This raises the possibility that the regulation of ephrin B2 expression is mediated through 9-cis RA binding to RXR-RXR homodimers, while EphB2 and EphB3 expression, might be regulated by all-trans RA binding to RAR-RXR heterodimers.

Two facts argue against the use of 9-cis RA binding to RXR-RXR homodimer to regulate the expression of ephrin B2: (1) when the levels of the various forms of RA, all-trans RA, 9-cis RA and 13-cis RA, were measured by HPLC at various stages of development in the chick retina, no significant levels of 9 cis-RA were detected at any stage (Mey et al., 1997); and (2) if the first model were to be true then mis-expression of RALDH1 in the ventral retina may be sufficient to turn on the expression of ephrin B2 ectopically. Experiments carried out to misexpress RALDH1 in the ventral retina failed to turn on ephrin B2 ectopically in that location (see Fig. S1 in the supplementary material). The other major difference between RALDH1 and RALDH3 is that RALDH3 is much more efficient than RALDH1 and therefore can act faster and at lower concentrations of the substrate. This difference could account for a large difference in gene expression.

Although we cannot completely discount Model 1, Model 2 most probably describes the mechanism by which EphB2, EphB3 and ephrin B2 are regulated. The enhancer regions of EphB2 and EphB3 may have sites that are regulated positively by Vax and also possibly have other sites positively regulated by RA either directly or indirectly. The presence of Vax, as well as RA activity, is required to activate transcription of EphB2 and EphB3, which does not happen in the absence of either factor. In the case of ephrin B2, the enhancer region may contain sites that are positively regulated by Tbx5 and other sites positively regulated by RA; the presence of both would be necessary to express ephrin B2. Further characterization of the enhancer regions of these guidance molecules to identify factors that directly bind to their enhancer regions and regulate their expression should shed more light on this. This could possibly resolve the intricate web of interactions between the early patterning genes such as Vax, Tbx5 and RA and any downstream factors that may mediate their function by regulating the expression of the topographic guidance molecules.

### Potential role of RA in other aspects of retinal patterning and development

The functional significance of the different ventral borders of expression of the two ephrin B molecules expressed in the dorsal retina is completely unknown. Our study reveals the strong dependence of expression of ephrin B2 on RA activity. The regulation of expression of ephrin B1 in the dorsal retina is either independent of RA signaling or only mildly dependent on it. Its expression is primarily determined by as yet unidentified upstream factors whose ventral border of expression must extend beyond the ventral border of Tbx5/RALDH1. Misexpression of Cyp26A1 led to loss of ephrin B2 without affecting the expression of ephrin B1, EphB2 or EphB3. This provides a unique situation to study the function of ephrin B2 in the developing retina. Reverse signaling through the ephrin B molecules may be involved in intra-retinal targeting of RGC axons to the optic disc (Birgbauer et al., 2000). One could glean more information about the function of the ephrin B molecules in the retina using RCAS-DNhRAR $\alpha$  and RCAS-Cyp26A1 as tools.

We thank Ronald M. Evans for the DNhRAR $\alpha$  construct, Eric Swindell for Cyp26A1 cDNA and B. Vennström for providing cTR $\beta$ 2 cDNA. We are grateful to the members of the Cepko and Tabin laboratories for critical discussion of the manuscript. This work was supported by Howard Hughes Medical Institute to C.L.C.; C.L.C. and J.S. are supported by HHMI.

### Supplementary material

Supplementary material for this article is available at <http://dev.biologists.org/cgi/content/full/132/23/5147/DC1>

### References

- Abu-Abed, S., MacLean, G., Fraulob, V., Chambon, P., Petkovich, M. and Dolle, P. (2002). Differential expression of the retinoic acid-metabolizing enzymes CYP26A1 and CYP26B1 during murine organogenesis. *Mech. Dev.* **110**, 173-177.
- Alexiades, M. R. and Cepko, C. (1996). Quantitative analysis of proliferation and cell cycle length during development of the rat retina. *Dev. Dyn.* **205**, 293-307.
- Ausubel, F. M., Brent, R., Kingston, R. E., Moore, D. D., Seidman, J. G., Smith, J. A. and Struhl, K. (1998). *Current Protocols in Molecular Biology*. New York: Wiley Publishing.
- Baniahmad, A., Tsai, S. Y., O'Malley, B. W. and Tsai, M. J. (1992). Kindred S thyroid hormone receptor is an active and constitutive silencer and a repressor for thyroid hormone and retinoic acid responses. *Proc. Natl. Acad. Sci. USA* **89**, 10633-10637.
- Barbieri, A. M., Broccoli, V., Bovolenta, P., Alfano, G., Marchitello, A., Mocchetti, C., Crippa, L., Bulfone, A., Marigo, V., Ballabio, A. et al. (2002). Vax2 inactivation in mouse determines alteration of the eye dorsal-ventral axis, misrouting of the optic fibres and eye coloboma. *Development* **129**, 805-813.
- Birgbauer, E., Cowan, C. A., Sretavan, D. W. and Henkemeyer, M. (2000). Kinase independent function of EphB receptors in retinal axon pathfinding to the optic disc from dorsal but not ventral retina. *Development* **127**, 1231-1241.
- Blackshaw, S., Harpavat, S., Trimarchi, J., Cai, L., Huang, H., Kuo, W. P., Weber, G., Lee, K., Fraioli, R. E., Cho, S. H. et al. (2004). Genomic analysis of mouse retinal development. *PLoS Biol.* **2**, E247.
- Blentic, A., Gale, E. and Maden, M. (2003). Retinoic acid signalling centres in the avian embryo identified by sites of expression of synthesising and catabolising enzymes. *Dev. Dyn.* **227**, 114-127.
- Braisted, J. E., McLaughlin, T., Wang, H. U., Friedman, G. C., Anderson, D. J. and O'Leary, D. D. (1997). Graded and lamina-specific distributions of ligands of EphB receptor tyrosine kinases in the developing retinotectal system. *Dev. Biol.* **191**, 14-28.

- Bruhn, S. L. and Cepko, C. L.** (1996). Development of the pattern of photoreceptors in the chick retina. *J. Neurosci.* **16**, 1430-1439.
- Chen, C. M. and Cepko, C. L.** (2002). The chicken RaxL gene plays a role in the initiation of photoreceptor differentiation. *Development* **129**, 5363-5375.
- Cheng, H. J., Nakamoto, M., Bergemann, A. D. and Flanagan, J. G.** (1995). Complementary gradients in expression and binding of ELF-1 and Mek4 in development of the topographic retinotectal projection map. *Cell* **82**, 371-381.
- Connor, R. J., Menzel, P. and Pasquale, E. B.** (1998). Expression and tyrosine phosphorylation of Eph receptors suggest multiple mechanisms in patterning of the visual system. *Dev. Biol.* **193**, 21-35.
- Crossland, W. J., Cowan, W. M., Rogers, L. A. and Kelly, J. P.** (1974). The specification of the retino-tectal projection in the chick. *J. Comp. Neurol.* **155**, 127-164.
- Damm, K., Thompson, C. C. and Evans, R. M.** (1989). Protein encoded by v-erbA functions as a thyroid-hormone receptor antagonist. *Nature* **339**, 593-597.
- Damm, K., Heyman, R. A., Umesono, K. and Evans, R. M.** (1993). Functional inhibition of retinoic acid response by dominant negative retinoic acid receptor mutants. *Proc. Natl. Acad. Sci. USA* **90**, 2989-2993.
- Drescher, U., Kremoser, C., Handwerker, C., Loschinger, J., Noda, M. and Bonhoeffer, F.** (1995). In vitro guidance of retinal ganglion cell axons by RAGS, a 25 kDa tectal protein related to ligands for Eph receptor tyrosine kinases. *Cell* **82**, 359-370.
- Dupe, V., Matt, N., Garnier, J. M., Chambon, P., Mark, M. and Ghyselinck, N. B.** (2003). A newborn lethal defect due to inactivation of retinaldehyde dehydrogenase type 3 is prevented by maternal retinoic acid treatment. *Proc. Natl. Acad. Sci. USA* **100**, 14036-14041.
- Fan, X., Molotkov, A., Manabe, S., Donmoyer, C. M., Deltour, L., Foglio, M. H., Cuenca, A. E., Blauer, W. S., Lipton, S. A. and Duester, G.** (2003). Targeted disruption of Aldh1a1 (Raldh1) provides evidence for a complex mechanism of retinoic acid synthesis in the developing retina. *Mol. Cell. Biol.* **23**, 4637-4648.
- Feldheim, D. A., Kim, Y. I., Bergemann, A. D., Frisen, J., Barbacid, M. and Flanagan, J. G.** (2000). Genetic analysis of ephrin-A2 and ephrin-A5 shows their requirement in multiple aspects of retinocollicular mapping. *Neuron* **25**, 563-574.
- Fujii, H., Sato, T., Kaneko, S., Gotoh, O., Fujii-Kuriyama, Y., Osawa, K., Kato, S. and Hamada, H.** (1997). Metabolic inactivation of retinoic acid by a novel P450 differentially expressed in developing mouse embryos. *EMBO J.* **16**, 4163-4173.
- Gronadona, J. M., Kastner, P., Gansmuller, A., Decimo, D., Chambon, P. and Mark, M.** (1996). Retinal dysplasia and degeneration in RARbeta2/RARgamma2 compound mutant mice. *Development* **122**, 2173-2188.
- Grun, F., Hirose, Y., Kawachi, S., Ogura, T. and Umesono, K.** (2000). Aldehyde dehydrogenase 6, a cytosolic retinaldehyde dehydrogenase prominently expressed in sensory neuroepithelia during development. *J. Biol. Chem.* **275**, 41210-41218.
- Hale, F.** (1937). The relation of maternal vitamin A deficiency to microphthalmia in pigs. *Tex. State J. Med.* **33**, 228-232.
- Hamburger, V. and Hamilton, H.** (1951). A series of normal stages in the development of the chick embryo. *J. Morphol.* **88**, 35-46.
- Hindges, R., McLaughlin, T., Genoud, N., Henkemeyer, M. and O'Leary, D. D.** (2002). EphB forward signaling controls directional branch extension and arborization required for dorsal-ventral retinotopic mapping. *Neuron* **35**, 475-487.
- Holash, J. A. and Pasquale, E. B.** (1995). Polarized expression of the receptor protein tyrosine kinase Cck5 in the developing avian visual system. *Dev. Biol.* **172**, 683-693.
- Hyatt, G. A. and Dowling, J. E.** (1997). Retinoic acid. A key molecule for eye and photoreceptor development. *Invest. Ophthalmol. Vis. Sci.* **38**, 1471-1475.
- Hyatt, G. A., Schmitt, E. A., Fadool, J. M. and Dowling, J. E.** (1996a). Retinoic acid alters photoreceptor development in vivo. *Proc. Natl. Acad. Sci. USA* **93**, 13298-13303.
- Hyatt, G. A., Schmitt, E. A., Marsh-Armstrong, N., McCaffery, P., Drager, U. C. and Dowling, J. E.** (1996b). Retinoic acid establishes ventral retinal characteristics. *Development* **122**, 195-204.
- Kalter, H. and Warkany, J.** (1959). Experimental production of congenital malformations in mammals by metabolic procedure. *Physiol. Rev.* **39**, 69-115.
- Kastner, P., Mark, M., Ghyselinck, N., Krezel, W., Dupe, V., Gronadona, J. M. and Chambon, P.** (1997). Genetic evidence that the retinoid signal is transduced by heterodimeric RXR/RAR functional units during mouse development. *Development* **124**, 313-326.
- Kliwer, S. A., Umesono, K., Mangelsdorf, D. J. and Evans, R. M.** (1992). Retinoid X receptor interacts with nuclear receptors in retinoic acid, thyroid hormone and vitamin D3 signalling. *Nature* **355**, 446-449.
- Koshiba-Takeuchi, K., Takeuchi, J. K., Matsumoto, K., Momose, T., Uno, K., Hoepker, V., Ogura, K., Takahashi, N., Nakamura, H., Yasuda, K. et al.** (2000). Tbx5 and the retinotectum projection. *Science* **287**, 134-137.
- Labrecque, J., Dumas, F., Lacroix, A. and Bhat, P. V.** (1995). A novel isoenzyme of aldehyde dehydrogenase specifically involved in the biosynthesis of 9-cis and all-trans retinoic acid. *Biochem. J.* **305**, 681-684.
- Lee, M. O., Manthey, C. L. and Sladek, N. E.** (1991). Identification of mouse liver aldehyde dehydrogenases that catalyze the oxidation of retinaldehyde to retinoic acid. *Biochem. Pharmacol.* **42**, 1279-1285.
- Li, H., Wagner, R., McCaffery, P., Smith, D., Andreadis, A. and Drager, U. C.** (2000). A retinoic acid synthesizing enzyme in ventral retina and telencephalon of the embryonic mouse. *Mech. Dev.* **95**, 283-289.
- Lin, M., Zhang, M., Abraham, M., Smith, S. M. and Napoli, J. L.** (2003). Mouse retinal dehydrogenase 4 (RALDH4), molecular cloning, cellular expression, and activity in 9-cis-retinoic acid biosynthesis in intact cells. *J. Biol. Chem.* **278**, 9856-9861.
- MacLean, G., Abu-Abed, S., Dolle, P., Tahayato, A., Chambon, P. and Petkovich, M.** (2001). Cloning of a novel retinoic-acid metabolizing cytochrome P450, Cyp26B1, and comparative expression analysis with Cyp26A1 during early murine development. *Mech. Dev.* **107**, 195-201.
- Mangelsdorf, D. J., Thummel, C., Beato, M., Herrlich, P., Schutz, G., Umesono, K., Blumberg, B., Kastner, P., Mark, M., Chambon, P. et al.** (1995). The nuclear receptor superfamily: the second decade. *Cell* **83**, 835-839.
- Mann, F., Ray, S., Harris, W. and Holt, C.** (2002). Topographic mapping in dorsoventral axis of the *Xenopus* retinotectal system depends on signaling through ephrin-B ligands. *Neuron* **35**, 461-473.
- Mark, M. and Chambon, P.** (2003). Functions of RARs and RXRs in vivo: genetic dissection of the retinoid signaling pathway. *Pure Appl. Chem.* **75**, 1709-1732.
- Marsh-Armstrong, N., McCaffery, P., Gilbert, W., Dowling, J. E. and Drager, U. C.** (1994). Retinoic acid is necessary for development of the ventral retina in zebrafish. *Proc. Natl. Acad. Sci. USA* **91**, 7286-7290.
- McCaffery, P., Tempst, P., Lara, G. and Drager, U. C.** (1991). Aldehyde dehydrogenase is a positional marker in the retina. *Development* **112**, 693-702.
- McCaffery, P., Lee, M. O., Wagner, M. A., Sladek, N. E. and Drager, U. C.** (1992). Asymmetrical retinoic acid synthesis in the dorsoventral axis of the retina. *Development* **115**, 371-382.
- McCaffery, P., Wagner, E., O'Neil, J., Petkovich, M. and Drager, U. C.** (1999). Dorsal and ventral retinoic territories defined by retinoic acid synthesis, break-down and nuclear receptor expression. *Mech. Dev.* **85**, 203-214.
- McLaughlin, T., Hindges, R. and O'Leary, D. D.** (2003a). Regulation of axial patterning of the retina and its topographic mapping in the brain. *Curr. Opin. Neurobiol.* **13**, 57-69.
- McLaughlin, T., Hindges, R., Yates, P. A. and O'Leary, D. D.** (2003b). Bifunctional action of ephrin-B1 as a repellent and attractant to control bidirectional branch extension in dorsal-ventral retinotopic mapping. *Development* **130**, 2407-2418.
- Mey, J., McCaffery, P. and Drager, U. C.** (1997). Retinoic acid synthesis in the developing chick retina. *J. Neurosci.* **17**, 7441-7449.
- Mey, J., McCaffery, P. and Klemeit, M.** (2001). Sources and sink of retinoic acid in the embryonic chick retina: distribution of aldehyde dehydrogenase activities, CRABP-I, and sites of retinoic acid inactivation. *Brain Res. Dev. Brain Res.* **127**, 135-148.
- Mic, F. A., Molotkov, A., Fan, X., Cuenca, A. E. and Duester, G.** (2000). RALDH3, a retinaldehyde dehydrogenase that generates retinoic acid, is expressed in the ventral retina, otic vesicle and olfactory pit during mouse development. *Mech. Dev.* **97**, 227-230.
- Morgan, B. A. and Fekete, D. M.** (1996). Manipulating gene expression with replication-competent retroviruses. *Methods Cell Biol.* **51**, 185-218.
- Morrow, E. M., Belliveau, M. J. and Cepko, C. L.** (1998). Two phases of rod photoreceptor differentiation during rat retinal development. *J. Neurosci.* **18**, 3738-3748.
- Mui, S. H., Hindges, R., O'Leary, D. D., Lemke, G. and Bertuzzi, S.** (2002). The homeodomain protein Vax2 patterns the dorsoventral and nasotemporal axes of the eye. *Development* **129**, 797-804.

- Peters, M. A. and Cepko, C. L.** (2002). The dorsal-ventral axis of the neural retina is divided into multiple domains of restricted gene expression which exhibit features of lineage compartments. *Dev. Biol.* **251**, 59-73.
- Petropoulos, C. J. and Hughes, S. H.** (1991). Replication-competent retrovirus vectors for the transfer and expression of gene cassettes in avian cells. *J. Virol.* **65**, 3728-3737.
- Ray, W. J., Bain, G., Yao, M. and Gottlieb, D. I.** (1997). CYP26, a novel mammalian cytochrome P450, is induced by retinoic acid and defines a new family. *J. Biol. Chem.* **272**, 18702-18708.
- Reijntjes, S., Gale, E. and Maden, M.** (2003). Expression of the retinoic acid catabolising enzyme CYP26B1 in the chick embryo and its regulation by retinoic acid. *Gene Expr. Patterns* **3**, 621-627.
- Reijntjes, S., Gale, E. and Maden, M.** (2004). Generating gradients of retinoic acid in the chick embryo: Cyp26C1 expression and a comparative analysis of the Cyp26 enzymes. *Dev. Dyn.* **230**, 509-517.
- Sakurai, T., Wong, E., Drescher, U., Tanaka, H. and Jay, D. G.** (2002). Ephrin-A5 restricts topographically specific arborization in the chick retinotectal projection in vivo. *Proc. Natl. Acad. Sci. USA* **99**, 10795-10800.
- Sakuta, H., Suzuki, R., Takahashi, H., Kato, A., Shintani, T., Iemura, S., Yamamoto, T. S., Ueno, N. and Noda, M.** (2001). Ventroptin: a BMP-4 antagonist expressed in a double-gradient pattern in the retina. *Science* **293**, 111-115.
- Schulte, D., Furukawa, T., Peters, M. A., Kozak, C. A. and Cepko, C. L.** (1999). Misexpression of the Emx-related homeobox genes cVax and mVax2 ventralizes the retina and perturbs the retinotectal map. *Neuron* **24**, 541-553.
- Simon, D. K. and O'Leary, D. D.** (1992a). Development of topographic order in the mammalian retinocollicular projection. *J. Neurosci.* **12**, 1212-1232.
- Simon, D. K. and O'Leary, D. D.** (1992b). Influence of position along the medial-lateral axis of the superior colliculus on the topographic targeting and survival of retinal axons. *Brain Res. Dev. Brain Res.* **69**, 167-172.
- Simon, D. K. and O'Leary, D. D.** (1992c). Responses of retinal axons in vivo and in vitro to position-encoding molecules in the embryonic superior colliculus. *Neuron* **9**, 977-989.
- Sjoberg, M., Vennstrom, B. and Forrest, D.** (1992). Thyroid hormone receptors in chick retinal development: differential expression of mRNAs for alpha and N-terminal variant beta receptors. *Development* **114**, 39-47.
- Sperry, R. W.** (1963). Chemoaffinity in the orderly growth of nerve fiber patterns and connections. *Proc. Natl. Acad. Sci. USA* **50**, 703-710.
- Suzuki, R., Shintani, T., Sakuta, H., Kato, A., Ohkawara, T., Osumi, N. and Noda, M.** (2000). Identification of RALDH-3, a novel retinaldehyde dehydrogenase, expressed in the ventral region of the retina. *Mech. Dev.* **98**, 37-50.
- Swindell, E. C., Thaller, C., Sockanathan, S., Petkovich, M., Jessell, T. M. and Eichele, G.** (1999). Complementary domains of retinoic acid production and degradation in the early chick embryo. *Dev. Biol.* **216**, 282-296.
- Tahayato, A., Dolle, P. and Petkovich, M.** (2003). Cyp26C1 encodes a novel retinoic acid-metabolizing enzyme expressed in the hindbrain, inner ear, first branchial arch and tooth buds during murine development. *Gene Expr. Patterns* **3**, 449-454.
- Taimi, M., Helvig, C., Wisniewski, J., Ramshaw, H., White, J., Amad, M., Korczak, B. and Petkovich, M.** (2004). A novel human cytochrome P450, CYP26C1, involved in metabolism of 9-cis and all-trans isomers of retinoic acid. *J. Biol. Chem.* **279**, 77-85.
- Umesono, K., Murakami, K. K., Thompson, C. C. and Evans, R. M.** (1991). Direct repeats as selective response elements for the thyroid hormone, retinoic acid, and vitamin D3 receptors. *Cell* **65**, 1255-1266.
- Usala, S. J., Menke, J. B., Watson, T. L., Wondisford, F. E., Weintraub, B. D., Berard, J., Bradley, W. E., Ono, S., Mueller, O. T. and Bercu, B. B.** (1991). A homozygous deletion in the c-erbA beta thyroid hormone receptor gene in a patient with generalized thyroid hormone resistance: isolation and characterization of the mutant receptor. *Mol. Endocrinol.* **5**, 327-335.
- Wagner, M., Han, B. and Jessell, T. M.** (1992). Regional differences in retinoid release from embryonic neural tissue detected by an in vitro reporter assay. *Development* **116**, 55-66.
- White, J. A., Ramshaw, H., Taimi, M., Stangle, W., Zhang, A., Everingham, S., Creighton, S., Tam, S. P., Jones, G. and Petkovich, M.** (2000). Identification of the human cytochrome P450, P450RAI-2, which is predominantly expressed in the adult cerebellum and is responsible for all-trans-retinoic acid metabolism. *Proc. Natl. Acad. Sci. USA* **97**, 6403-6408.
- Wilkinson, D. G.** (2001). Multiple roles of EPH receptors and ephrins in neural development. *Nat. Rev. Neurosci.* **2**, 155-164.
- Wilson, J. G., Roth, C. B. and Warkany, J.** (1953). An analysis of the syndrome of malformations induced by maternal vitamin A deficiency. Effects of restoration of vitamin A at various times during gestation. *Am. J. Anat.* **92**, 189-217.
- Yates, P. A., Roskies, A. L., McLaughlin, T. and O'Leary, D. D.** (2001). Topographic-specific axon branching controlled by ephrin-As is the critical event in retinotectal map development. *J. Neurosci.* **21**, 8548-8563.
- Yoshida, A., Rzhetsky, A., Hsu, L. C. and Chang, C.** (1998). Human aldehyde dehydrogenase gene family. *Eur. J. Biochem.* **251**, 549-557.
- Zenke, M., Munoz, A., Sap, J., Vennstrom, B. and Beug, H.** (1990). v-erbA oncogene activation entails the loss of hormone-dependent regulator activity of c-erbA. *Cell* **61**, 1035-1049.
- Zhao, D., McCaffery, P., Ivins, K. J., Neve, R. L., Hogan, P., Chin, W. W. and Drager, U. C.** (1996). Molecular identification of a major retinoic-acid-synthesizing enzyme, a retinaldehyde-specific dehydrogenase. *Eur. J. Biochem.* **240**, 15-22.
